# Supplementary material for: Psychosocial Comorbidities and Health Status Among Adults with Moderate-to-Severe Atopic Dermatitis: A 2017 US National Health and Wellness Survey Analysis
Source: PubMed Central journal article supplement — Adv Ther. 2021 Feb 8;38(3):1627–37. doi: 10.1007/s12325-021-01630-z (PMC7932976; doi:10.1007/s12325-021-01630-z), 2021-02-08

**Supplemental materials for: Prevalence and Impact of Psychosocial Comorbidities on Health Status  
Among Respondents With Moderate-to-Severe Atopic Dermatitis in the United States: A Cross-  
Sectional Study of the 2017 US National Health and Wellness Survey**

*American Journal of Clinical Dermatology*

Shawn G. Kwatra,<sup>1</sup> David Gruben,<sup>2</sup> Selwyn Fung,<sup>3</sup> Marco DiBonaventura<sup>3</sup>

<sup>1</sup>Johns Hopkins School of Medicine, Baltimore, Maryland; <sup>2</sup>Pfizer Inc., Groton, Connecticut; <sup>3</sup>Pfizer Inc.,  
New York, New York

**Correspondence to:** Marco DiBonaventura, Pfizer Inc., 235 East 42nd Street, New York, NY, 10017;

E-mail: marco.dibonaventura@pfizer.com

**Supplementary Table 1.** Adjusted mean quality of life, work and activity impairment, and healthcare resource utilization by severity of sleep difficulties

|                                      | Severity of sleep difficulties, mean (95% CI) |                         |                         |                         |
|--------------------------------------|-----------------------------------------------|-------------------------|-------------------------|-------------------------|
|                                      | No sleep difficulties                         | Mild                    | Moderate                | Severe                  |
| Health utilities (EQ-5D-5L)          | 0.67<br>(0.61–0.74)                           | 0.63*<br>(0.56–0.69)    | 0.60*<br>(0.53–0.67)    | 0.51*<br>(0.44–0.58)    |
| Absenteeism (WPAI-GH), %             | 18.69<br>(7.94–29.44)                         | 17.03<br>(6.02–28.04)   | 20.86<br>(9.78–31.94)   | 32.14*<br>(20.13–44.16) |
| Presenteeism (WPAI-GH), %            | 37.59<br>(23.53–51.65)                        | 44.53*<br>(30.13–58.93) | 46.76*<br>(32.27–61.26) | 45.69<br>(29.75–61.64)  |
| Overall work impairment (WPAI-GH), % | 44.25<br>(29.17–59.33)                        | 50.81*<br>(35.37–66.26) | 54.47*<br>(38.92–70.03) | 54.71*<br>(37.60–71.82) |
| Activity impairment (WPAI-GH), %     | 48.27<br>(37.25–59.28)                        | 57.62*<br>(46.54–68.71) | 62.33*<br>(51.06–73.59) | 65.34*<br>(53.38–77.30) |
| Physician visits in past 6 months    | 11.19<br>(7.20–17.37)                         | 12.96<br>(8.38–20.04)   | 14.53*<br>(9.26–22.78)  | 17.66*<br>(10.97–28.45) |
| Hospitalizations in past 6 months    | 0.87<br>(0.22–3.42)                           | 0.68<br>(0.18–2.63)     | 0.73<br>(0.18–2.94)     | 1.17<br>(0.28–4.95)     |

|                            |                     |                     |                    |                      |
|----------------------------|---------------------|---------------------|--------------------|----------------------|
| ER visits in past 6 months | 1.02<br>(0.35–2.95) | 0.82<br>(0.28–2.35) | 1.18<br>(0.4–3.46) | 1.91*<br>(0.63–5.76) |
|----------------------------|---------------------|---------------------|--------------------|----------------------|

*EQ-5D-5L*, EuroQol 5-dimension, 5-level questionnaire; *ER*, emergency room; *WPAI-GH*, Work Productivity and Activity Impairment questionnaire—General Health version.

Adjusted means were calculated based on the results of generalized linear models that controlled for age, sex, race/ethnicity, education, income, employment status, body mass index, smoking status, alcohol use, Charlson comorbidity index, and the presence of other atopic conditions.

\* $P < 0.05$  relative to “no sleep difficulties.”

**Supplementary Table 2.** Adjusted mean quality of life, work and activity impairment, and healthcare resource utilization by PHQ-9 depression severity

|                                      | PHQ-9 depression severity (95% CI) |                         |                         |                         |                         |
|--------------------------------------|------------------------------------|-------------------------|-------------------------|-------------------------|-------------------------|
|                                      | None/<br>minimal                   | Mild                    | Moderate                | Moderately<br>severe    | Severe                  |
| Health utilities (EQ-5D-5L)          | 0.75<br>(0.68–0.83)                | 0.68*<br>(0.60–0.75)    | 0.64*<br>(0.57–0.72)    | 0.59*<br>(0.51–0.66)    | 0.49*<br>(0.42–0.57)    |
| Absenteeism (WPAI-GH), %             | 17.19<br>(2.55–31.84)              | 21.74<br>(7.34–36.13)   | 26.61*<br>(11.87–41.35) | 35.98*<br>(21.15–50.82) | 35.59*<br>(20.40–50.78) |
| Presenteeism (WPAI-GH), %            | 34.49<br>(15.95–53.03)             | 44.06*<br>(25.81–62.30) | 55.88*<br>(37.21–74.54) | 60.81*<br>(42.02–79.59) | 65.51*<br>(46.23–84.78) |
| Overall work impairment (WPAI-GH), % | 42.42<br>(22.76–62.09)             | 53.07*<br>(33.72–72.42) | 67.10*<br>(47.30–86.89) | 73.65*<br>(53.73–93.58) | 76.49*<br>(56.05–96.93) |
| Activity impairment (WPAI-GH), %     | 33.87<br>(21.51–46.23)             | 45.23*<br>(32.94–57.52) | 53.82*<br>(41.53–66.11) | 64.16*<br>(51.58–76.75) | 70.81*<br>(58.17–83.44) |
| Physician visits in past 6 months    | 7.72<br>(4.76–12.50)               | 10.45*<br>(6.52–16.75)  | 10.89*<br>(6.73–17.65)  | 14.27*<br>(8.76–23.25)  | 17.74*<br>(10.85–29.00) |
| Hospitalizations in past 6 months    | 1.14                               | 1.29                    | 1.25                    | 1.50*                   | 1.43*                   |

|                            |                     |                      |                      |                      |                      |
|----------------------------|---------------------|----------------------|----------------------|----------------------|----------------------|
|                            | (0.63–1.66)         | (0.78–1.80)          | (0.73–1.76)          | (0.98–2.03)          | (0.90–1.96)          |
| ER visits in past 6 months | 0.61<br>(0.21–1.77) | 1.38*<br>(0.49–3.84) | 1.46*<br>(0.51–4.19) | 1.80*<br>(0.62–5.19) | 2.94*<br>(1.01–8.54) |

*EQ-5D-5L*, EuroQol 5-dimension, 5-level questionnaire; *ER*, emergency room; *PHQ-9*, Patient Health Questionnaire-9; *WPAI-GH*, Work Productivity and Activity Impairment questionnaire—General Health version.

Adjusted means were calculated based on the results of generalized linear models that controlled for age, sex, race/ethnicity, education, income, employment status, body mass index, smoking status, alcohol use, Charlson comorbidity index, and the presence of other atopic conditions.

\* $P < 0.05$  relative to “none/minimal.”

**Supplementary Table 3.** Adjusted mean quality of life, work and activity impairment, and healthcare resource utilization by presence of anxiety

|                                      | Presence of anxiety (95% CI) |                         |
|--------------------------------------|------------------------------|-------------------------|
|                                      | No anxiety                   | Anxiety                 |
| Health utilities (EQ-5D-5L)          | 0.76<br>(0.68–0.85)          | 0.68*<br>(0.60–0.77)    |
| Absenteeism (WPAI-GH), %             | 21.13<br>(6.04–36.22)        | 23.48<br>(8.50–38.47)   |
| Presenteeism (WPAI-GH), %            | 42.96<br>(23.53–62.38)       | 47.34<br>(28.04–66.63)  |
| Overall work impairment (WPAI-GH), % | 51.95<br>(31.09–72.80)       | 57.63*<br>(36.92–78.35) |
| Activity impairment (WPAI-GH), %     | 37.38<br>(23.77–51.00)       | 46.10*<br>(32.67–59.54) |
| Physician visits in past 6 months    | 6.50<br>(3.96–10.67)         | 9.04*<br>(5.54–14.74)   |
| Hospitalizations in past 6 months    | 1.15<br>(0.24–5.46)          | 0.76*<br>(0.16–3.57)    |
| ER visits in past 6 months           | 0.85<br>(0.28–2.57)          | 0.85<br>(0.29–2.54)     |

*EQ-5D-5L*, EuroQol 5-dimension, 5-level questionnaire; *ER*, emergency room; *WPAI-GH*, Work

Productivity and Activity Impairment questionnaire—General Health version.

Adjusted means were calculated based on the results of generalized linear models that controlled for age, sex, race/ethnicity, education, income, employment status, body mass index, smoking status, alcohol use, Charlson comorbidity index, and the presence of other atopic conditions.

\* $P < 0.05$  relative to “no anxiety.”

**Supplementary Figure 1.** Prevalence of sleep difficulties, depression, and anxiety among respondents with moderate-to-severe atopic dermatitis.

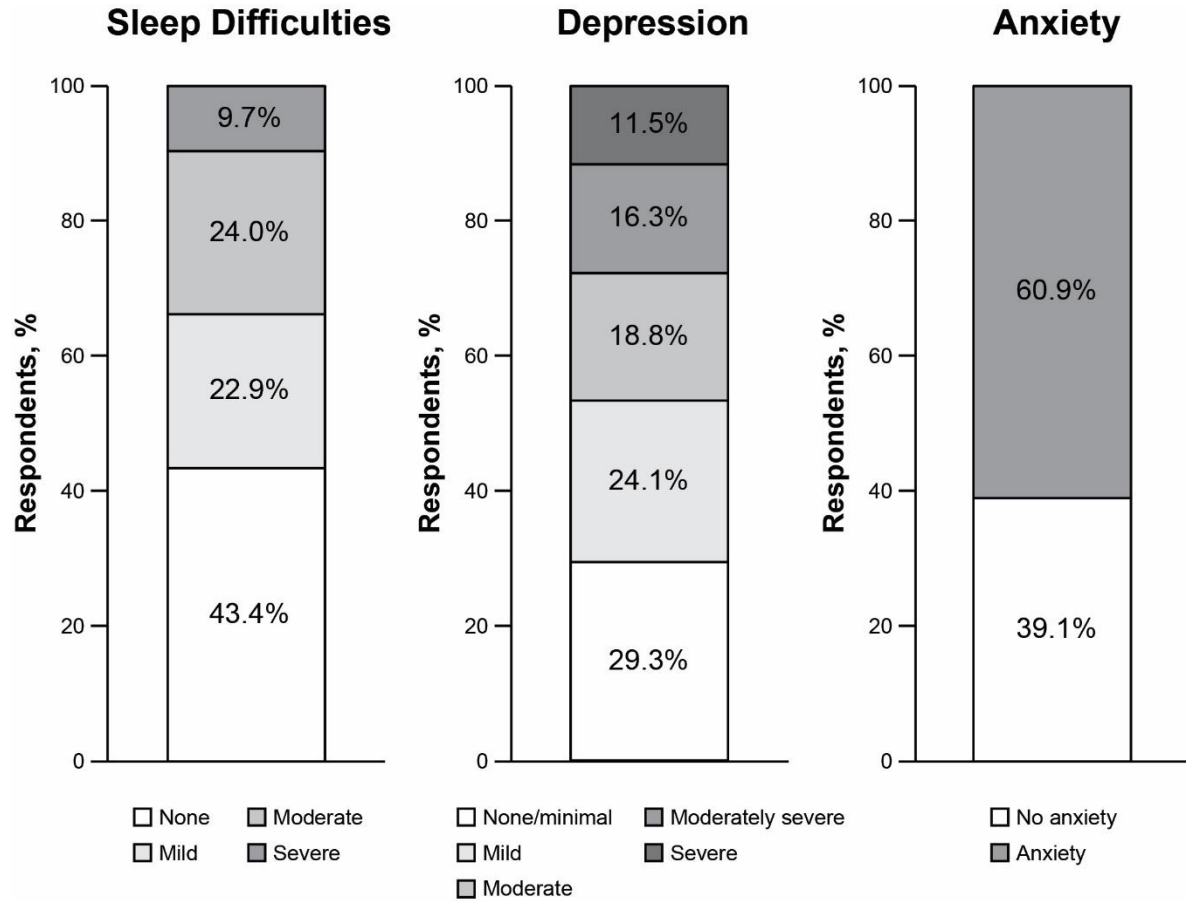

Supplement: 12325_2021_1630_MOESM1_ESM.pdf [file 12325_2021_1630_MOESM1_ESM.pdf]
